# Supplementary material
Source: PubMed Central journal article supplement (PMC6800037)

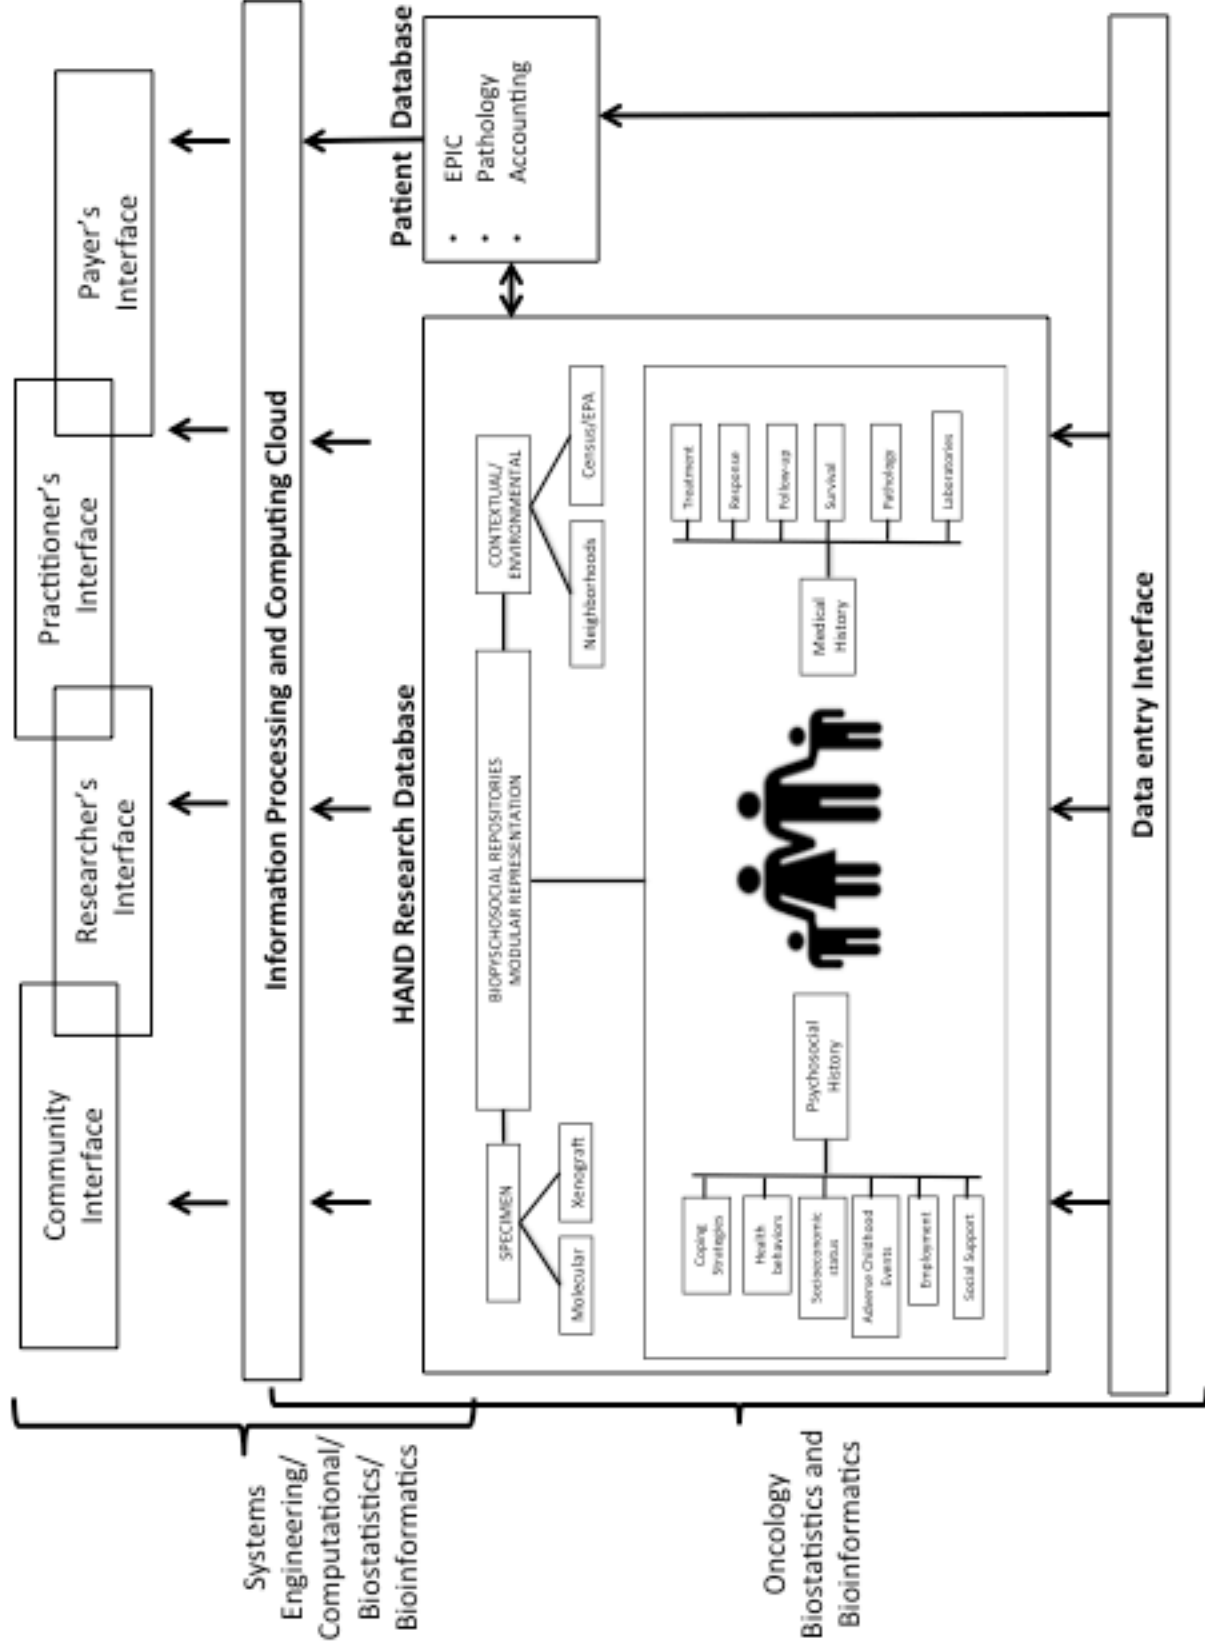

Supplement: NIHMS1522081-supplement-2.pdf [file NIHMS1522081-supplement-2.pdf]
